# Supplementary material for: Ameliorated synthetic methodology for crystalline lanthanoid–metalloporphyrin open frameworks based on a multitopic octacarboxy-porphyrin scaffold: structural, gas sorption and photophysical properties
Source: Royal Society of Chemistry journal article supplement (doi:10.1039/c5ce02048d), 2015-11-13
Supplement: c5ce02048d1.pdf [file c5ce02048d1.pdf]

SUPPLEMENTARY INFORMATION

Ameliorated synthetic methodology of crystalline lanthanoid-metalloporphyrin open frameworks based on the multi-topic octacarboxy-porphyrin scaffold; structural, gas sorption and photophysical properties<sup>†</sup>

Bharat Kumar Tripuramallu, Hatem M. Titi, Sandipan Roy, Roli Verma and Israel Goldberg.

## Experimental section

**Materials and Methods** All the chemicals were received as reagent grade and used without any further purification. The porphyrin building block Zn-H<sub>8</sub>OCPP was prepared according to literature procedures.<sup>[1]</sup> Infrared spectra of solid samples were obtained Bruker Tensor 27 system spectrophotometer in ATR mode. Powder X-ray diffraction patterns were recorded on a Bruker D8-Advance diffractometer using graphite monochromated CuK $\alpha_1$  (1.5406 Å) and K $\alpha_2$  (1.54439 Å) radiation. Gas adsorption isotherms of Gd-MPF-1 were performed by using Quantachrome gas adsorption analyzer. Photo physical studies were performed through spin coating of the crystalline LnMPFs in toluene solutions on a glass slide. The experiments were done on Horiba scientific FluorEssence spectrophotometer by placing the LnMPF-1 coated glass slide at 0° to the detector.

**Synthesis of LnMPF-1 (Ln=Gd, Sm, Dy, Eu and Tb).** Zn-H<sub>8</sub>OCPP (2.5 mg, 0.0025 mmol) and Ln(NO<sub>3</sub>)<sub>3</sub>.xH<sub>2</sub>O (10.0 mg) were dissolved in 500  $\mu$ l DMF. The mixture was sealed in a screw cap vial and heated at 120°C in a bath reactor. After two hours 325  $\mu$ L of 1N NaOH was added and sonicated for few minutes to obtain a purple turbid solution which was then heated at same temperature for 7 days to obtain a block shaped crystals of LnMPF-1s along with white powder. The crystals were separated by filtration and washed with DMF, acetone and water several times, air dried for further characterizations For GdMPF-1, Yield : ~15 %. FTIR (cm<sup>-1</sup>): 3367, 2924, 2361, 2084, 1538, 1428, 1369, 995, 775, 712, 418

**Crystal Structure Determinations.** The X-ray measurements (ApexDuo, Bruker-AXS, MoK $\alpha$  radiation) for the analyzed LnMPF-1 compounds [Ln = Gd (**1**), Sm (**2**), Dy (**3**), Eu (**4**) and Tb (**5**)] were carried out at ca. 110(2) K on crystals coated with a thin layer of amorphous oil to minimize crystal deterioration, possible structural disorder and related thermal motion effects, and to optimize the precision of the structural results. Compounds **1-5** are isostructural, exhibiting very similar unit-cell dimensions. Full crystallographic analysis was performed on **1-4**; crystals of **5** were of very poor quality and were found unsuitable for independent crystal structure determination. Structures **1-4** were solved by direct methods and refined by full-matrix least-squares (SHELXTL-2014 and SHELXL-2014).<sup>[2]</sup> They were found to

contain severely disordered crystallization solvent (DMF) within the intra-lattice voids, which couldn't be modeled by discrete atoms. Correspondingly, the contribution of the disordered solvent moieties was subtracted from the diffraction pattern by the SQUEEZE procedure and PLATON software.<sup>[3]</sup> The five-coordinate Zn(H<sub>2</sub>O)-OCPP entity was found to exhibit twofold disorder, with the Zn(H<sub>2</sub>O) fragment displaced in a given unit either above or below the porphyrin macrocycle. The solvent accessible voids in all four structures are in the range of 58-59% of the crystal volume. Due to the disordered solvent in such wide voids, as well as translational pseudo-symmetry, the analyzed crystals diffracted poorly, revealing additional minor disorder of the porphyrin component. Some of them revealed also non-merohedral twinning. The crystal data for **1-4** are (excluding the lattice-included DMF solvent):

**(1)** C<sub>52</sub>H<sub>30</sub>Gd<sub>2</sub>N<sub>4</sub>Na<sub>2</sub>O<sub>21</sub>Zn, Mr = 1472.65, orthorhombic, space group Imma, a = 27.631(2), b = 29.080(3), c=13.136(1) Å, V = 10555(3) Å<sup>3</sup>, T = 110 K, Z = 4, μ(MoKa) = 1.519 mm<sup>-1</sup>, ρ(calcd) = 0.93 g·cm<sup>-3</sup>, 15176 reflections measured to θ = 25.10°, of which 4846 were unique (Rint = 0.054) and 3101 with I > 2σ(I). Final R1 = 0.065 (wR2 = 0.184) for the 3101 data above the intensity threshold, and R1 = 0.087 (wR2 = 0.196) for all unique data. CCDC 1422227.

**(2)** C<sub>52</sub>H<sub>30</sub>Sm<sub>2</sub>N<sub>4</sub>Na<sub>2</sub>O<sub>21</sub>Zn, Mr = 1458.85, orthorhombic, space group Imma, a = 27.108(4), b = 29.418(3), c=12.972(2) Å, V = 10345(2) Å<sup>3</sup>, T = 110 K, Z = 4, μ(MoKa) = 1.402 mm<sup>-1</sup>, ρ(calcd) = 0.94 g·cm<sup>-3</sup>, 19423 reflections measured to θ = 25.09°, of which 4794 were unique (Rint = 0.103) and 1740 with I > 2σ(I). Final R1 = 0.074 (wR2 = 0.167) for the 1740 data above the intensity threshold, and R1 = 0.160 (wR2 = 0.179) for all unique data. CCDC 1422228.

**(3)** C<sub>52</sub>H<sub>30</sub>Dy<sub>2</sub>N<sub>4</sub>Na<sub>2</sub>O<sub>21</sub>Zn, Mr = 1482.16, orthorhombic, space group Imma, a = 27.1337(11), b = 29.2422(14), c=13.0757(7) Å, V = 10375(5) Å<sup>3</sup>, T = 110 K, Z = 4, μ(MoKa) = 1.707 mm<sup>-1</sup>, ρ(calcd) = 0.95 g·cm<sup>-3</sup>, 10069 reflections measured to θ = 25.03°, of which 2528 were unique (Rint = 0.031) and 2088 with I > 2σ(I). Final R1 = 0.052 (wR2 = 0.146) for the 2088 data above the intensity threshold, and R1 = 0.060 (wR2 = 0.150) for all unique data. CCDC 1422229.

**(4)** C<sub>52</sub>H<sub>30</sub>Eu<sub>2</sub>N<sub>4</sub>Na<sub>2</sub>O<sub>21</sub>Zn, Mr = 1466.13, orthorhombic, space group Imma, a = 27.4347(11), b = 29.9058(12), c=13.1157(7) Å, V = 10401(1) Å<sup>3</sup>, T = 110 K, Z = 4, μ(MoKa) = 1.472 mm<sup>-1</sup>, ρ(calcd) = 0.93 g·cm<sup>-3</sup>, 18462 reflections measured to θ =

25.05°, of which 4800 were unique ( $R_{int} = 0.076$ ) and 3475 with  $I > 2\sigma(I)$ . Final  $R_1 = 0.104$  ( $wR_2 = 0.282$ ) for the 3475 data above the intensity threshold, and  $R_1 = 0.122$  ( $wR_2 = 0.290$ ) for all unique data. CCDC 1422230.

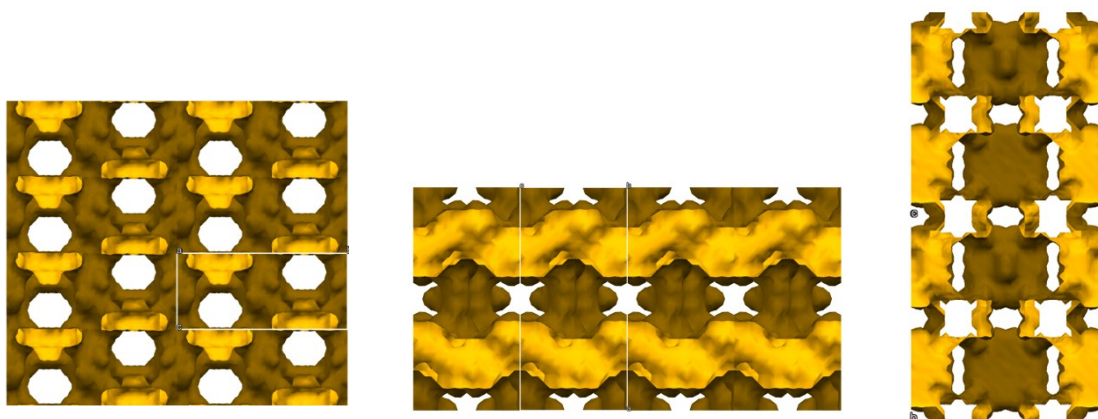

**Fig S1.** Projection of 1D zig-zag tubular channels along a, b and c axis (left to right)

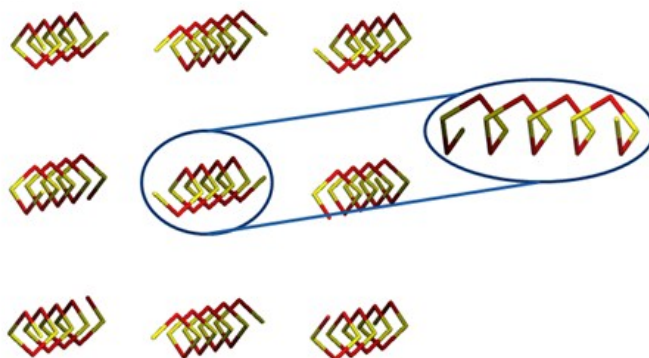

**Fig S2.** The illustration of the topological view of  $\{\text{NaGd}(\text{H}_2\text{O})_2\}$  exhibiting the helical type of chain, which are oriented clockwise and anticlockwise

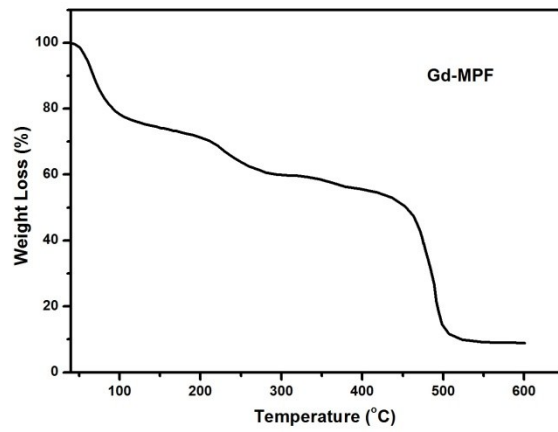

**Fig S3.** Thermogravimetric curve of GdMPF-1

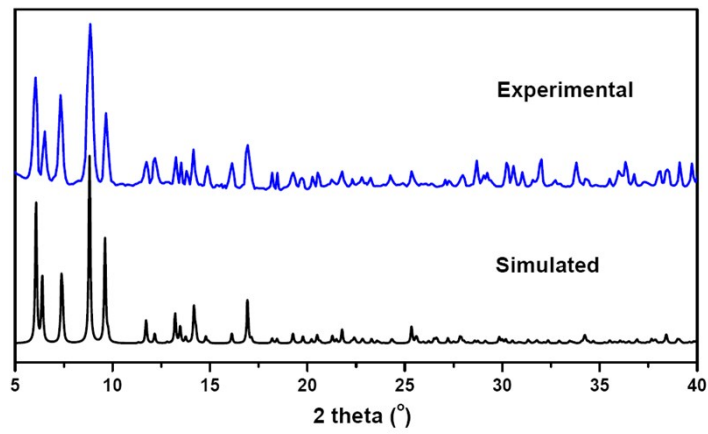

**Fig S4.** Powder X-ray patterns of GdMPF-1

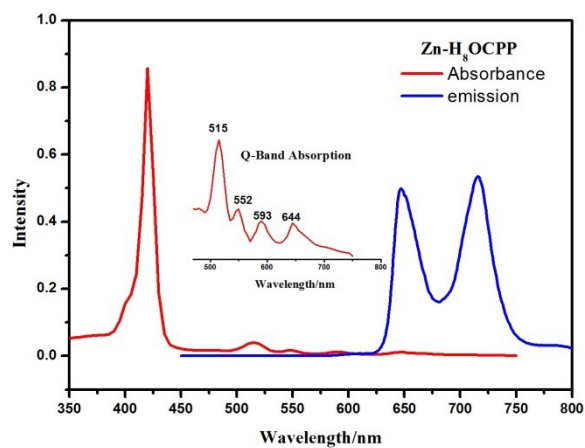

**Fig S5a.** Absorbance and emission spectra of Zn-H<sub>8</sub>OCPP.

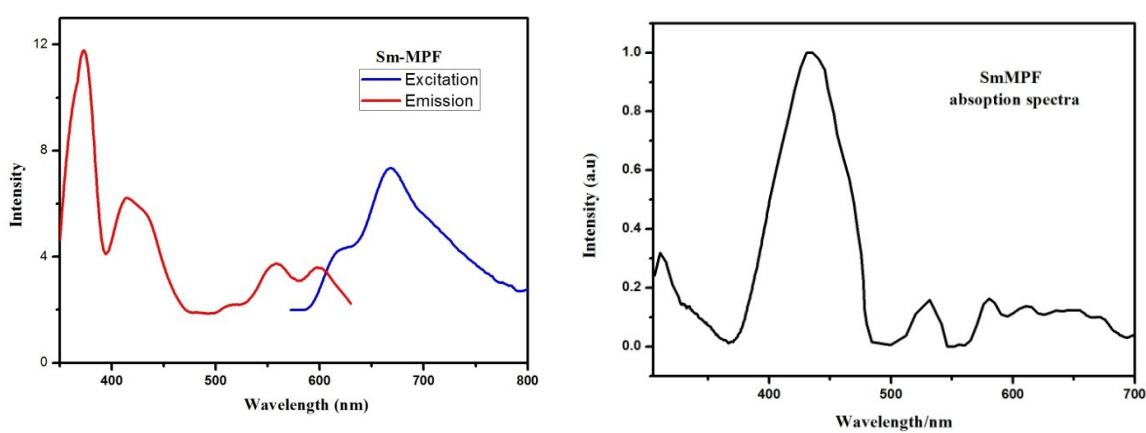

**Fig S5b.** Excitation, emission spectra (left) and absorption spectra (right) of SmMPF-1

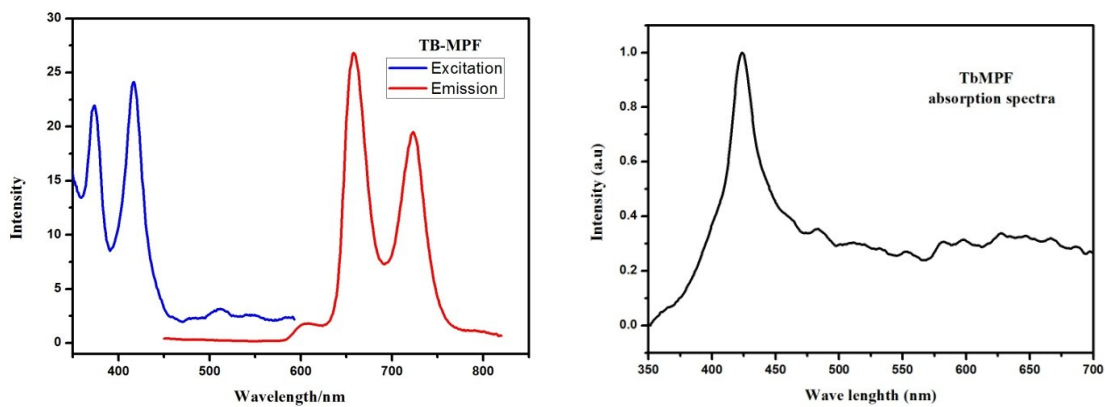

**Fig S5c.** Excitation, emission spectra (left) and absorption spectra (right) of TbMPF-1

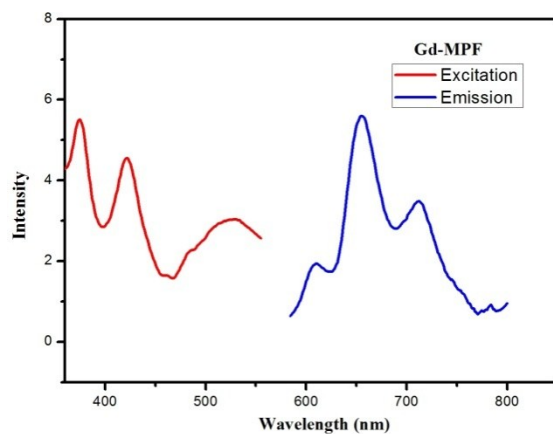

**Fig S5d.** Excitation and emission spectra GdMPF-1

## References

- [1] W. Fudickar, J. Zimmermann, L. Ruhlmann, J. Schneider, B. Roldner, U. Siggel, J.-H. Fuhrhop, *J. Am. Chem. Soc.* **1999**, *121*, 9539-9545.
- [2] (a) G. M. Sheldrick, *Acta Cryst.* **2015**, *A71*, 3-8. (b) G. M. Sheldrick, *Acta Cryst.* **2015**, *C71*, 3-8.
- [3] A. L. Spek, *Acta Cryst.* **2015**, *C71*, 9-18.
